# Supplementary material for: Multi-organ Dysfunction in Patients with COVID-19: A Systematic Review and Meta-analysis
Source: PubMed Central journal article supplement (PMC7390520; doi:10.14336/ad.2020.0520), 2020-05-13
Supplement: AD-11-4-874-suppl.pdf [file AD-11-4-874-suppl.pdf]

## **Multi-organ Dysfunction in Patients with COVID-19: A Systematic Review and Meta-analysis**

**Ting Wu<sup>1,2</sup>, Zhihong Zuo<sup>1,3</sup>, Shuntong Kang<sup>1,3</sup>, Liping Jiang<sup>3</sup>, Xuan Luo<sup>4</sup>, Zanxian Xia<sup>5,6</sup>, Jing Liu<sup>1</sup>, Xiaojuan Xiao<sup>1</sup>, Mao Ye<sup>7</sup>, Meichun Deng<sup>1,3,6,\*</sup>**

<sup>1</sup>Department of Biochemistry and Molecular Biology & Hunan Province Key Laboratory of Basic and Applied Hematology, School of Life Sciences, Central South University, Hunan 410013, China. <sup>2</sup>Department of Cardiovascular Medicine, The Third Xiangya Hospital, Central South University, Changsha, Hunan 410013, China. <sup>3</sup>Xiangya School of Medicine, Central South University, Hunan 410013, China. <sup>4</sup>Hunan Yuanpin Cell Biotechnology Co., Ltd, Hunan 410129, China. <sup>5</sup>Department of Cell Biology, School of Life Sciences, Central South University, Changsha 410013, China. <sup>6</sup>Hunan Key Laboratory of Animal Models for Human Diseases, Hunan Key Laboratory of Medical Genetics & Center for Medical Genetics, School of Life Sciences, Central South University, Changsha 410013, China. <sup>7</sup>Molecular Science and Biomedicine Laboratory, State Key Laboratory for Chemo/Biosensing and Chemometrics, College of Biology, College of Chemistry and Chemical Engineering, Collaborative Innovation Center for Molecular Engineering for Theranostics, Hunan University, Changsha, China

# SUPPLEMENTARY DATA

## Diabetes

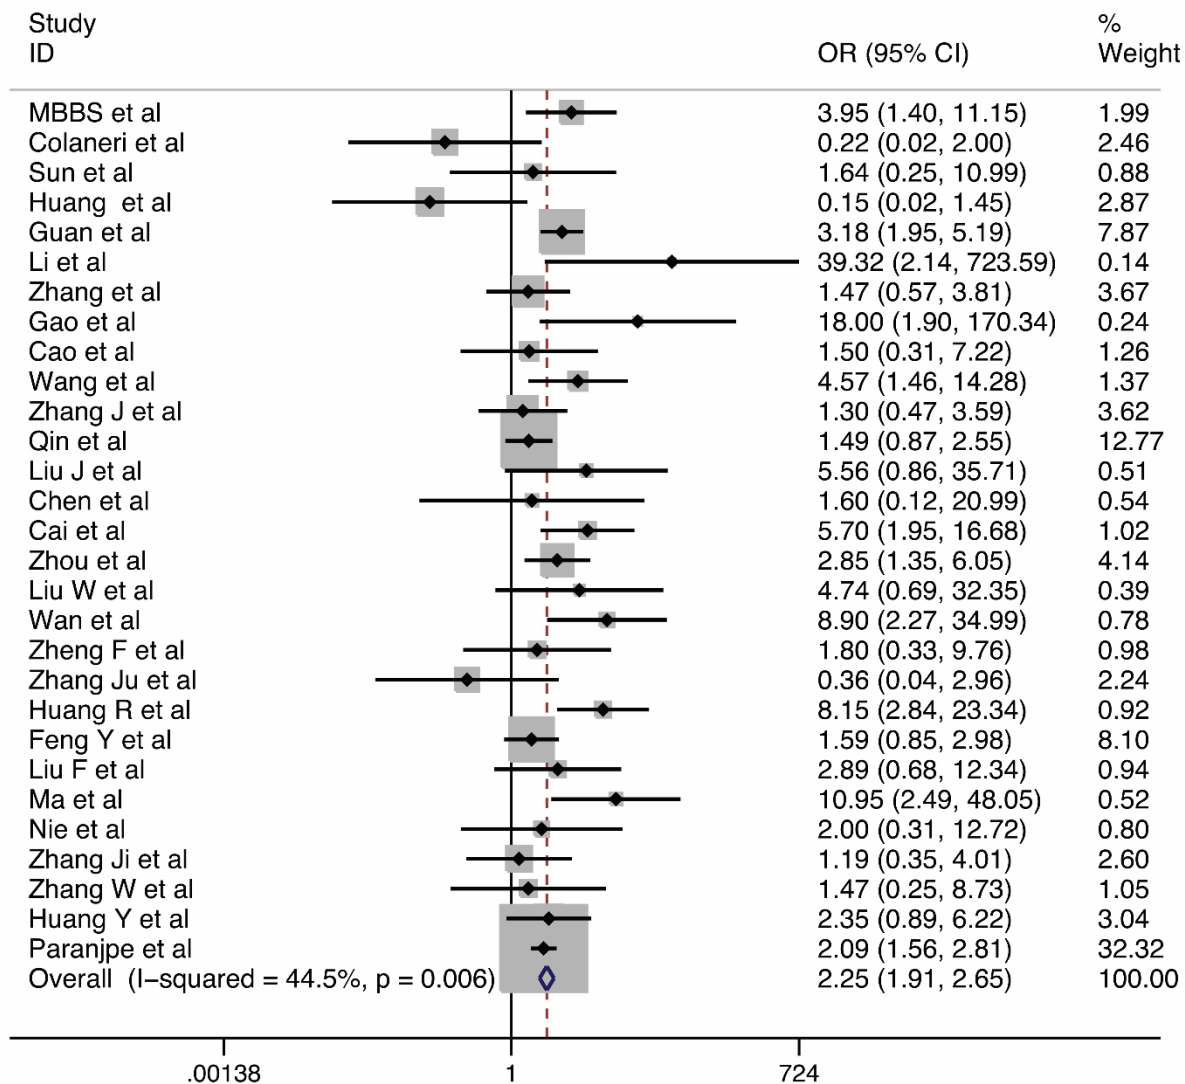

Supplementary Figure 1. Relationship between diabetes and COVID-19 severity.

# SUPPLEMENTARY DATA

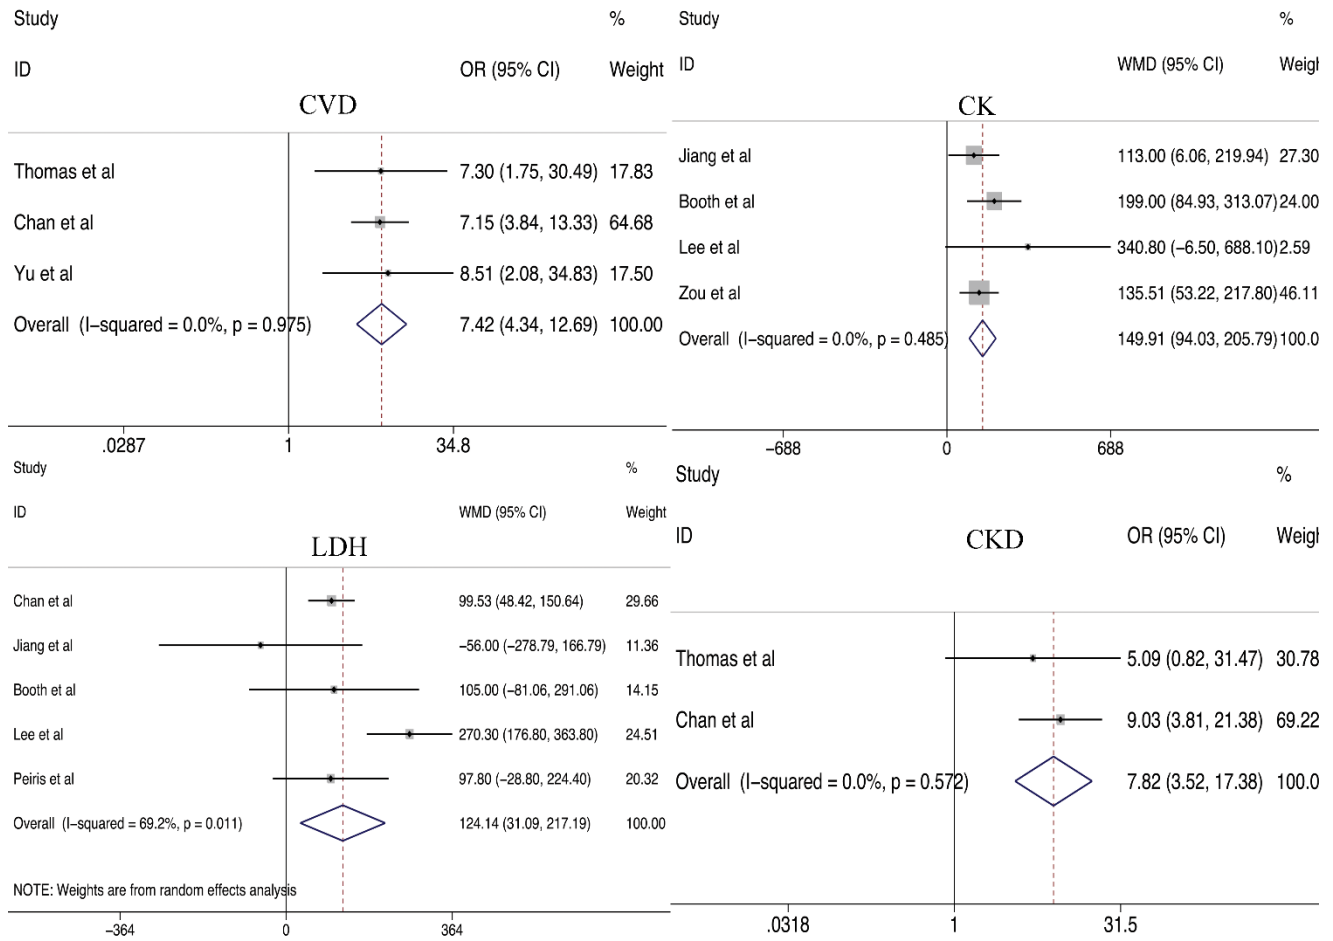

**Supplementary Figure 2.** Relationship between organ dysfunction (CVD, CK, LDH and CK) and SARS severity.

# SUPPLEMENTARY DATA

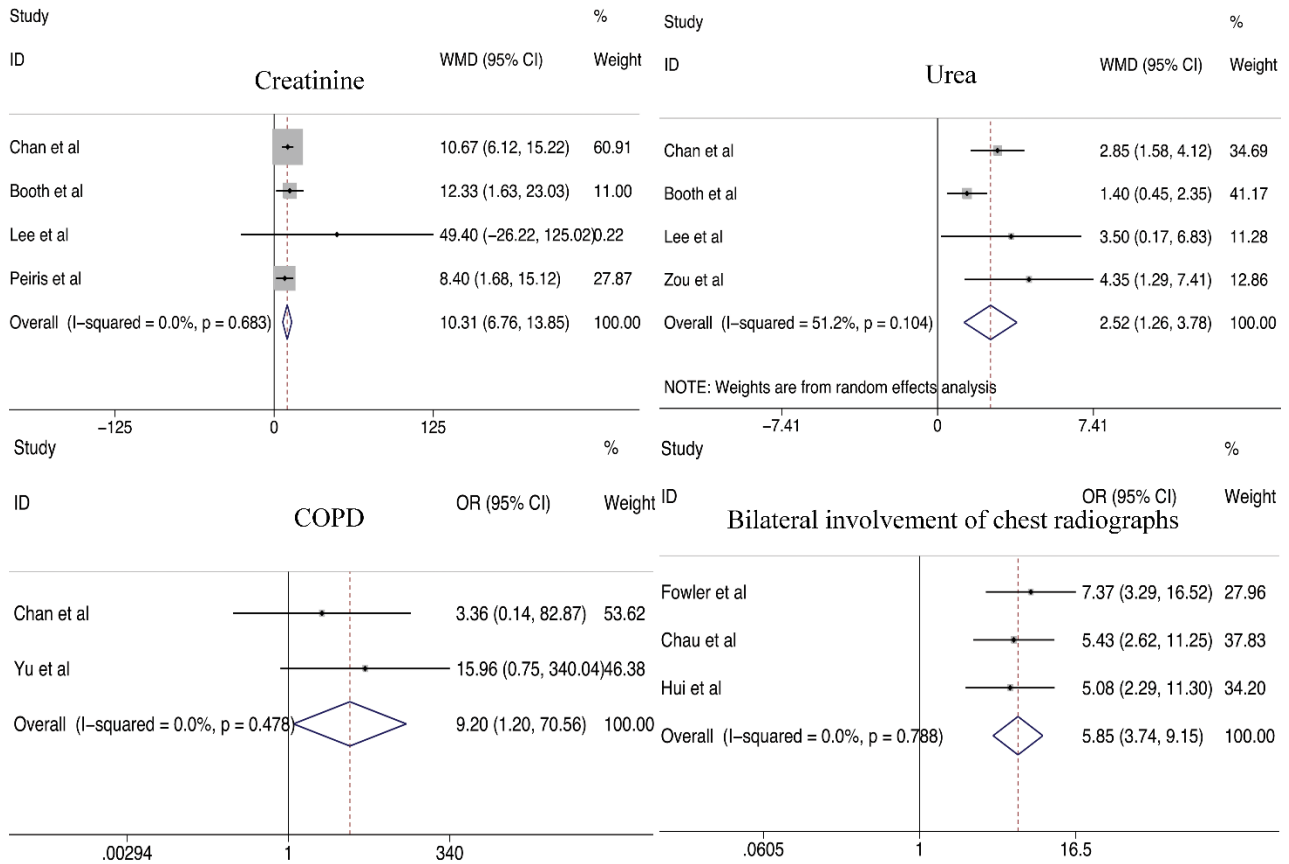

**Supplementary Figure 3.** Relationship between organ dysfunction (Creatinine, Urea, COPD and Bilateral involvement of chest radiographs) and SARS severity.

# SUPPLEMENTARY DATA

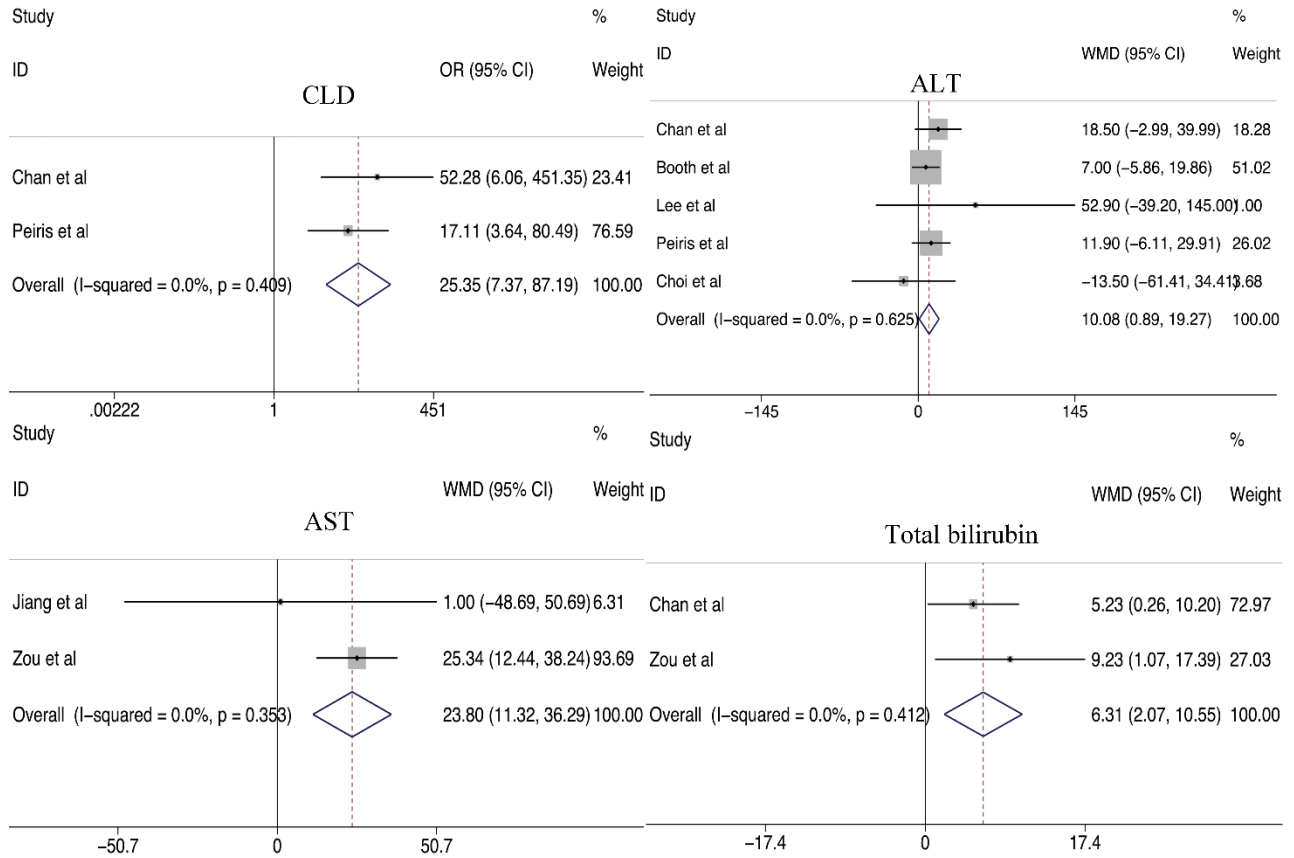

**Supplementary Figure 4.** Relationship between organ dysfunction (CLD, ALT, AST and Total bilirubin) and SARS severity.

# SUPPLEMENTARY DATA

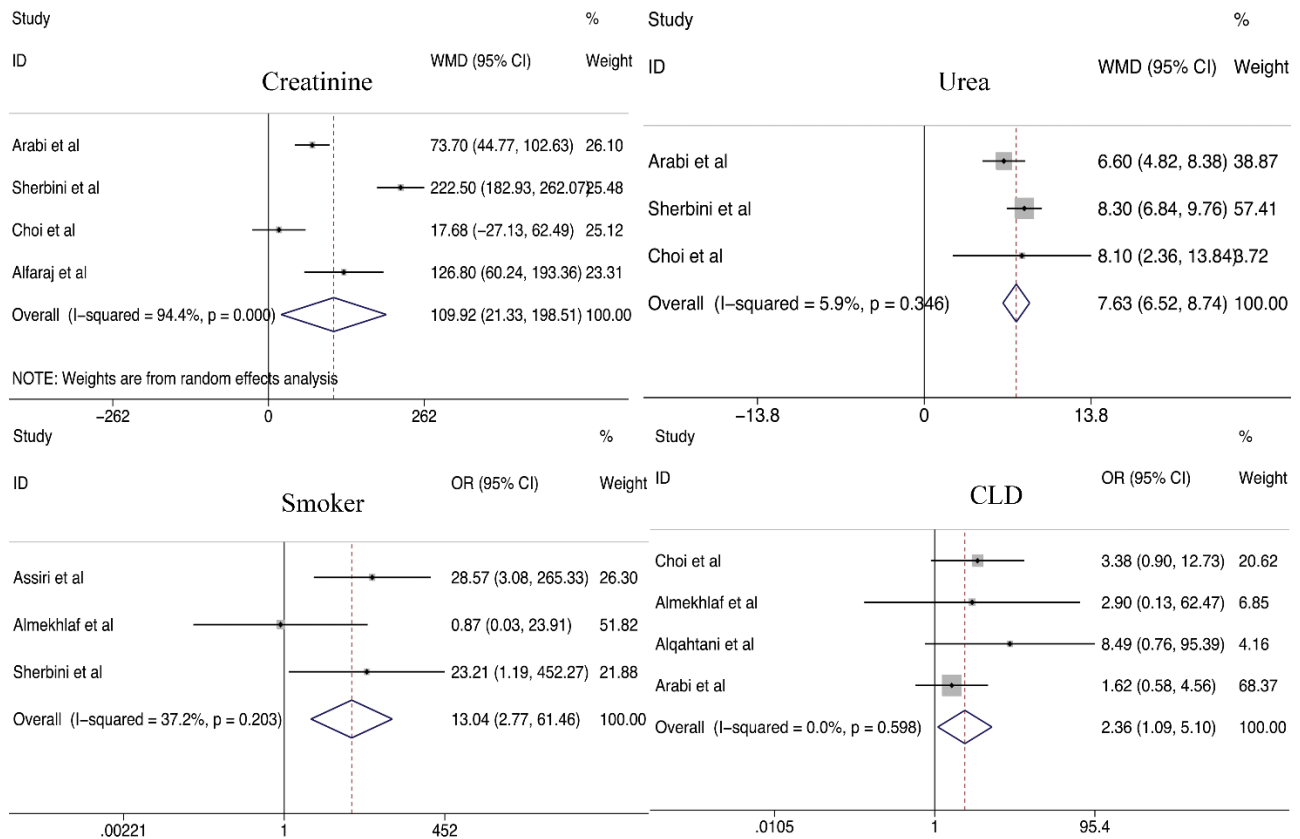

**Supplementary Figure 5.** Relationship between organ dysfunction (Creatinine, Urea, Smoker and CLD) and MERS severity.

# SUPPLEMENTARY DATA

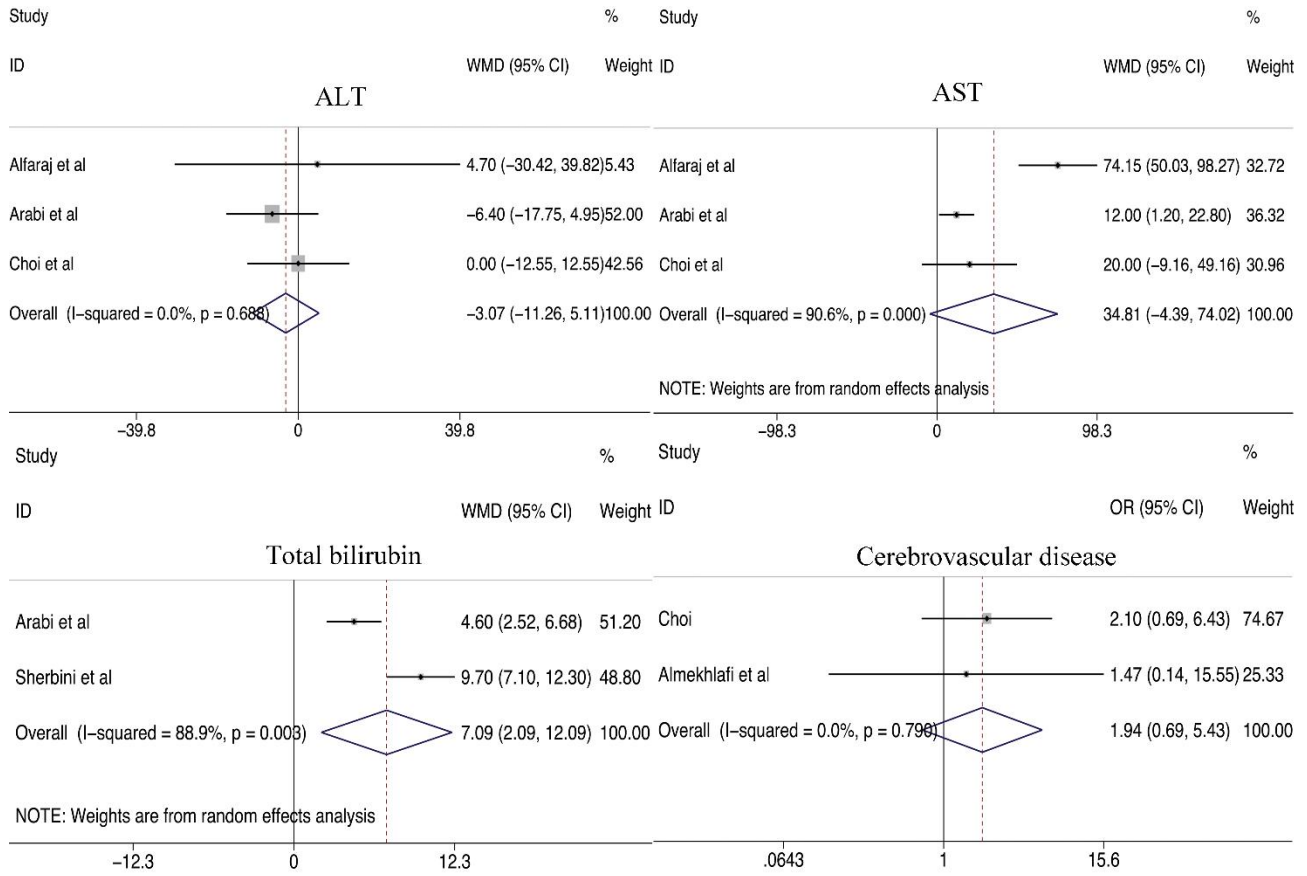

**Supplementary Figure 6.** Relationship between organ dysfunction (ALT, AST, Total bilirubin and Cerebrovascular disease) and MERS severity.

# SUPPLEMENTARY DATA

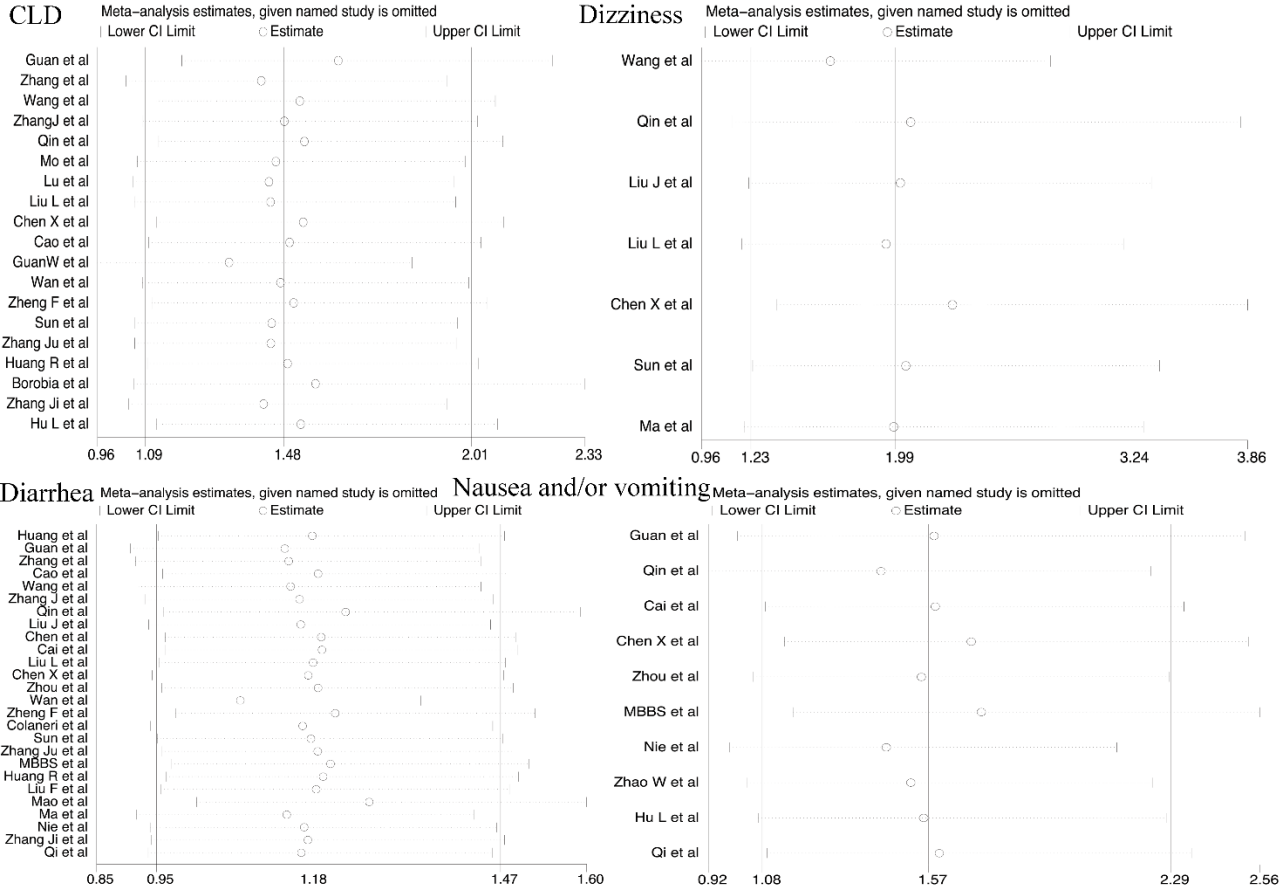

Supplementary Figure 7. Sensitivity analysis of outcomes: CLD, Dizziness, Nausea and/or vomiting and Diarrhea.



# SUPPLEMENTARY DATA

**Supplementary Table 1.** Characteristics of included studies.

| First author                      | Date                                                 | Country | Patients (N) | Average Age | Sex Male (%) | Research Type       | Clinical symptoms                                                                                                  | Quality  |
|-----------------------------------|------------------------------------------------------|---------|--------------|-------------|--------------|---------------------|--------------------------------------------------------------------------------------------------------------------|----------|
| <i>Huang et al</i> <sup>8</sup>   | Dec 16 <sup>th</sup> 2019-Jan 2 <sup>nd</sup> 2020   | China   | 41           | 49.0        | 73.0         | Retrospective study | Fever 98% / Cough 76%<br>Dyspnoea 55%<br>Myalgia/fatigue 44%                                                       | High     |
| <i>Zhao et al</i> <sup>15</sup>   |                                                      | China   | 101          | 44.44       | 55.4         | Retrospective study | Fever 78.2% / Cough 62.4%<br>Myalgia or fatigue 16.8%<br>Sore throat 11.9% /<br>Dyspnea 1.0%                       | Moderate |
| <i>Xu et al</i> <sup>16</sup>     | Jan-Feb 2020                                         | China   | 50           | 43.9        | 58           | Retrospective study | Fever 86% / Cough 40%<br>Fatigue 16% / Muscle ache 16%<br>Expectoration 14%                                        | High     |
| <i>Guan et al</i> <sup>17</sup>   | Dec 11 <sup>th</sup> 2019- Jan 29 <sup>th</sup> 2020 | China   | 1099         | 47          | 58.1         | Retrospective study | Fever 88.7% / Cough 67.8%<br>Fatigue 38.1%<br>Sputum production 33.7%<br>Shortness of breath 18.7%                 | High     |
| <i>Liu et al</i> <sup>11</sup>    | Jan 21 <sup>st</sup> - Feb 3 <sup>rd</sup> 2020      | China   | 73           | 41.6        | 56.2         | Retrospective study | Fever 93 % / Cough 82%<br>Fatigue 75 % / Anorexia 27 %<br>Sputum production 53%                                    | High     |
| <i>Li et al</i> <sup>18</sup>     | Jan-Feb 2020                                         | China   | 83           | 45.5        | 53.0         | Retrospective study | Fever 86.7% / Cough 78.3%<br>Expectoration 18.1%<br>Myalgia 18.1% / Headache 10.8%                                 | High     |
| <i>Wu et al</i> <sup>40</sup>     | Jan 22 <sup>th</sup> - Feb 14 <sup>th</sup> 2020     | China   | 80           | 46.1        | 48.75        | Retrospective study | Fever 78.75% / Cough 63.75%<br>Shortness of breath 37.50%<br>Muscle ache 22.50%<br>Headache/mental disorder 16.25% | High     |
| <i>Qu et al</i> <sup>14</sup>     | Jan-Feb 2020                                         | China   | 30           | 50.5        | 53.3         | Retrospective study |                                                                                                                    | Moderate |
| <i>Zheng et al</i> <sup>20</sup>  |                                                      | China   | 103          | 44.39       | 53.4         | Retrospective study |                                                                                                                    | Moderate |
| <i>Qian et al</i> <sup>19</sup>   | Jan-Feb 2020                                         | China   | 91           | 50          | 40.66        | Retrospective study | Fever 71.43% / Cough 60.44%<br>Fatigue 43.96% /Anorexia 25.27%<br>Expectoration 32.97%                             | Moderate |
| <i>Zhang et al</i> <sup>20</sup>  | Jan 2 <sup>nd</sup> -Feb 10 <sup>th</sup> 2020       | China   | 221          | 55          | 48.9         | Retrospective study | Fever 90.5% / Fatigue 70.6%<br>Cough 61.5% / Anorexia 36.2%<br>Dyspnea 29.0%                                       | High     |
| <i>Qin et al</i> <sup>25</sup>    | Jan 10 <sup>th</sup> - Feb 12 <sup>th</sup> 2020     | China   | 452          | 58          | 52.0         | Retrospective study | Fever 92.6%<br>Shortness of breath 50.8%<br>Expectoration 41.4%<br>Fatigue 46.4%/Dry cough 33.3%                   | Moderate |
| <i>Tabata et al</i> <sup>22</sup> | Feb 11 <sup>th</sup> - Feb 25 <sup>th</sup> 2020     | Japan   | 104          | 68          | 45.2         | Retrospective study | Fever 34.6% / Cough 41.3%<br>Malaise 21.2% Tachypnea 23.1%<br>Runny nose 24.0%                                     | Moderate |
| <i>Cao et al</i> <sup>23</sup>    | Jan 20 <sup>th</sup> - Feb 15 <sup>th</sup> 2020     | China   | 198          | 50.1        | 51.0         | Retrospective study | Fever 86.9% / Cough 50.0%<br>Sputum production 27.8%<br>Myalgia or fatigue 29.8%                                   | High     |

# SUPPLEMENTARY DATA

|                                    |                                                            |       |       |       |       |                        |                                                                                                              |          |
|------------------------------------|------------------------------------------------------------|-------|-------|-------|-------|------------------------|--------------------------------------------------------------------------------------------------------------|----------|
|                                    |                                                            |       |       |       |       |                        | Headache or Dizziness<br>12.1%                                                                               |          |
| <i>Wang et al</i> <sup>12</sup>    | Jan 1 <sup>st</sup> -Jan<br>28 <sup>th</sup> 2020          | China | 138   | 56    | 54.3  | Retrospective<br>study | Fever 98.6% / Fatigue<br>69.6%<br>Dry cough 59.4%/Myalgia<br>34.8%<br>Anorexia 39.9%                         | High     |
| <i>Zhang J et al</i> <sup>24</sup> | Jan 16 <sup>th</sup> -Feb<br>3 <sup>rd</sup> 2020          | China | 140   | 57    | 50.7  | Retrospective<br>study | Fever 91.7% / Cough<br>75.0%<br>Fatigue 75.0%<br>Gastrointestinal symptoms<br>39.6%                          | High     |
| <i>Chen X et al</i> <sup>33</sup>  | Jan 23 <sup>rd</sup> -<br>Feb 14 <sup>th</sup><br>2020     | China | 291   | 46    | 49.8  | Retrospective<br>study | Fever 68.7% / Cough<br>60.5%<br>Fatigue 31.6% / Myalgia<br>9.3%<br>Headache 6.9%                             | High     |
| <i>Mo et al</i> <sup>26</sup>      | Jan 1 <sup>st</sup> - Feb<br>5 <sup>th</sup> 2020          | China | 155   | 54    | 55.5  | Retrospective<br>study | Fever 81.3%/ Cough<br>62.6%<br>Chest distress 39.4%<br>Fatigue 73.2%<br>Myalgia or arthralgia<br>61.0%       | High     |
| <i>Liu J et al</i> <sup>27</sup>   | Jan 5 <sup>th</sup> - Jan<br>24 <sup>th</sup> 2020         | China | 40    | 48.7  | 37.5  | Retrospective<br>study | Fever 90.0% / Cough<br>82.5%<br>Sputum production 52.5%<br>Chill 25% / Fatigue 55%<br>Fever 100% / Cough 80% | Moderate |
| <i>Chen et al</i> <sup>28</sup>    | Dec 19 <sup>th</sup><br>2019-Jan<br>27 <sup>th</sup> 2020  | China | 21    | 56.3  | 81.0  | Retrospective<br>study | Fatigue 85% / Myalgia<br>40%<br>Sputum production 25%<br>Fever 64.4% / Cough<br>18.1%                        | High     |
| <i>Cai et al</i> <sup>29</sup>     | Jan 11 <sup>th</sup> -<br>Feb 6 <sup>th</sup> 2020         | China | 298   | 47    | 50    | Retrospective<br>study | Fatigue 2.0% / Headache<br>1.3%<br>Diarrhea 2.0%<br>Fever 90.9% / Fatigue<br>25.3%                           | High     |
| <i>Lu et al</i> <sup>31</sup>      | Before Feb<br>7 <sup>th</sup> 2020                         | China | 265   |       |       | Retrospective<br>study | Cough 49.4%/ Inappetence<br>11.7%<br>Expectoration 23.0%<br>Fever 84.3% / Cough<br>74.5%                     | Moderate |
| <i>Lie L et al</i> <sup>32</sup>   | Jan 20 <sup>th</sup> -<br>Feb 3 <sup>rd</sup> 2020         | China | 51    | 45    | 62.7  | Retrospective<br>study | Fatigue 43.1% / Dyspnea<br>21.6%<br>Muscular soreness 11.8%                                                  | High     |
| <i>Gao et al</i> <sup>21</sup>     | Jan 23 <sup>rd</sup> -Feb<br>2 <sup>nd</sup> 2020          | China | 43    | 43.74 | 60.47 | Retrospective<br>study |                                                                                                              | Moderate |
| <i>Liu W et al</i> <sup>41</sup>   | Dec 30 <sup>th</sup><br>2019- Jan<br>15 <sup>th</sup> 2020 | China | 78    | 38    | 50    | Retrospective<br>study | Cough 43.6%                                                                                                  | Moderate |
| <i>Zhang Y et al</i> <sup>44</sup> | Up to Feb<br>11 <sup>th</sup> 2020                         | China | 44672 |       | 51.4  | Retrospective<br>study |                                                                                                              | Moderate |
| <i>Guan W et al</i> <sup>42</sup>  | Dec 30 <sup>th</sup><br>2019- Jan<br>31 <sup>st</sup> 2020 | China | 1590  | 48.9  | 57.3  | Retrospective<br>study | Fever 88%<br>Coughing 70.2%<br>Fatigue 42.8%<br>productive cough 36%<br>Fever 76.5% / Cough<br>58.4%         | High     |
| <i>Yang et al</i> <sup>34</sup>    | Jan 17 <sup>th</sup> -<br>Feb 10 <sup>th</sup><br>2020     | China | 149   | 45.11 | 54.4  | Retrospective<br>study | Expectoration 32.2%<br>Sore throat 14.09% / Chill<br>14.09%                                                  | High     |
| <i>Chen N et al</i> <sup>35</sup>  | Jan 1 <sup>st</sup> - Jan<br>20 <sup>th</sup> 2020         | China | 99    | 55.5  | 67.7  | Retrospective<br>study | Fever 83% / Cough 82%<br>Shortness of breath 31%<br>Muscle ache 11% /<br>Confusion 9%                        | High     |
| <i>Xu X et al</i> <sup>36</sup>    | Jan 10 <sup>th</sup> -<br>Jan 26 <sup>th</sup> -<br>2020   | China | 62    | 41    | 56    | Retrospective<br>study | Fever 77%/<br>Myalgia/fatigue 52%<br>Cough 81% /<br>Expectoration 56%                                        | Moderate |

# SUPPLEMENTARY DATA

|                                     |                                                            |                  |      |      |      |                        |                                                                                                             |          |
|-------------------------------------|------------------------------------------------------------|------------------|------|------|------|------------------------|-------------------------------------------------------------------------------------------------------------|----------|
| <i>Shi et al</i> <sup>37</sup>      | Dec 20 <sup>th</sup><br>2019-Jan<br>23 <sup>rd</sup> 2020  | China            | 81   | 49.5 | 52   | Retrospective<br>study | Headache 34%<br>Fever 73% / Dyspnoea<br>42%<br>Cough 59% / Rhinorrhea<br>26%<br>Chest tightness 22%         | Moderate |
| <i>Zhou et al</i> <sup>38</sup>     | Dec 29 <sup>th</sup><br>2019- Jan<br>31 <sup>st</sup> 2020 | China            | 191  | 56   | 62   | Retrospective<br>study | Fever 94% / Cough 79%<br>Sputum 23% / Myalgia<br>15%<br>Fatigue 23%                                         | High     |
| <i>Liu K et al</i> <sup>39</sup>    | Dec 30 <sup>th</sup><br>2019- Jan<br>24 <sup>th</sup> 2020 | China            | 137  | 57   | 44.5 | Retrospective<br>study | Fever 81.8% / Coughing<br>48.2%<br>Muscle pain or fatigue<br>32.1%<br>Dyspnea 19.0% /<br>Headache 9.5%      | Moderate |
| <i>Wan et al</i> <sup>45</sup>      | Jan 23 <sup>th</sup> -Feb<br>8 <sup>th</sup> 2020          | China            | 135  | 46   | 53.3 | Retrospective<br>study | Fever 88.9%<br>Cough 76.5%<br>myalgia or fatigue 32.5%<br>Headache 17.7%                                    | High     |
| <i>Zhao W et al</i> <sup>48</sup>   | Jan 21 <sup>st</sup> -Feb<br>8 <sup>th</sup> 2020          | China            | 77   | 52   | 44.2 | Retrospective<br>study | Fever 85.7% /Cough<br>63.7%<br>Fatigue 27.3%<br>Shortness of breath 20.8%<br>Headache or dizziness<br>13.0% | Moderate |
| <i>YangYet et al</i> <sup>43</sup>  | Up to Jan<br>26 <sup>th</sup> 2020                         | China            | 4021 | 49   | 55   | Retrospective<br>study |                                                                                                             | Moderate |
| <i>Ma et al</i> <sup>49</sup>       | Jan 21 <sup>st</sup> -<br>Mar2 <sup>nd</sup> 2020          | China            | 84   | 48   | 57.1 | Retrospective<br>study | Fever 64.3% /Cough<br>51.2%<br>Expectoration 33.3%<br>Fatigue 19.0%/Anorexia<br>16.7%                       | Moderate |
| <i>Nie et al</i> <sup>50</sup>      | 9 <sup>th</sup> – 28 <sup>th</sup> Feb<br>2020             | China            | 97   | 39   | 35.1 | Retrospective<br>study | Fever 58.8% /Cough<br>55.7%<br>Fatigue 33% / Diarrhea<br>12.45%<br>Sputum production 15.5%                  | High     |
| <i>Xu Xi et al</i> <sup>46</sup>    | Jan 23 <sup>th</sup> -Feb<br>4 <sup>th</sup> 2020          | China            | 90   | 50   | 44.5 | Retrospective<br>study | Fever 78% / Coughing<br>63%<br>Fatigue 21%/Myalgia 28%<br>Sore throat 26%                                   | Moderate |
| <i>Qi et al</i> <sup>47</sup>       | Jan 19 <sup>th</sup> -<br>Feb 16 <sup>th</sup><br>2020     | China            | 267  | 48   | 55.8 | Retrospective<br>study | Fever 84.3%/ Cough<br>70.8%<br>Fatigue 77.8%/ Dyspnea<br>16.2%<br>Nasal congestion 19.9%                    | High     |
| <i>Hu L et al</i> <sup>51</sup>     | Jan 8 <sup>th</sup> - Feb<br>20 <sup>th</sup> 2020         | China            | 323  | 61   | 51.4 | Retrospective<br>study | Fever 83.9% Cough50.8%<br>Dyspnea 4.3% /Chest<br>distress 0.9%<br>Headache 0.9%                             | High     |
| <i>Levinson et al</i> <sup>53</sup> | Mar 10 <sup>th</sup> -<br>23 <sup>rd</sup> 2020            | Israel           | 42   | 34   | 44.2 | Retrospective<br>study | Cough 69% /Fatigue 69%<br>Myalgia or arthralgia 57%<br>Headache 48% /Dyspnea<br>43%                         | Moderate |
| <i>Petrilli et al</i> <sup>52</sup> | Mar 1 <sup>st</sup> -Apr<br>2 <sup>nd</sup> 2020           | United<br>States | 4103 |      |      | Retrospective<br>study |                                                                                                             | High     |
| <i>Huang Y et al</i> <sup>54</sup>  | Jan 1 <sup>st</sup> -Mar<br>8 <sup>th</sup> 2020           | China            | 223  | 62.0 | 56.5 | Retrospective<br>study | Fever 78.9% /Cough<br>69.1%<br>Fatigue 56.5%/Diarrhea<br>6.7%<br>Rhinitis 38.3% Cough<br>35.4%              | Moderate |
| <i>Fontanet et al</i> <sup>55</sup> | Mar 30 <sup>th</sup> - 4 <sup>th</sup><br>Apr 2020         | France           | 661  | 37   | 38.0 | Retrospective<br>study | Headache 30.9% /Asthenia<br>29.6%<br>Sore throat 26.8%                                                      | Moderate |
| <i>Paranjpe et al</i> <sup>56</sup> | Feb 27 <sup>th</sup> -<br>Apr 2 <sup>nd</sup> 2020         | United<br>States | 2199 | 65   | 58.8 | Retrospective<br>study |                                                                                                             | Moderate |

# SUPPLEMENTARY DATA

|                                             |                                                         |                                                     |       |       |      |                        |                                                                                                                                 |          |
|---------------------------------------------|---------------------------------------------------------|-----------------------------------------------------|-------|-------|------|------------------------|---------------------------------------------------------------------------------------------------------------------------------|----------|
| <i>Buscarini et al</i> <sup>57</sup>        | Feb 21 <sup>st</sup> -<br>Mar 13 <sup>th</sup><br>2020  | Italy                                               | 411   |       | 67.6 | Retrospective<br>study |                                                                                                                                 | Moderate |
| <i>Docherty et al</i> <sup>58</sup>         | Feb 6 <sup>th</sup> - Apr<br>18 <sup>th</sup> 2020      | United<br>Kingdom                                   | 16749 | 72    |      | Prospective<br>study   | Cough 70% /Fever 69%<br>Shortness of breath 65%<br>Fever 71.2% /Cough<br>61.7%                                                  | Moderate |
| <i>Borobia et al</i> <sup>59</sup>          | Feb 25 <sup>th</sup> -<br>Apr 19 <sup>th</sup><br>2020  | Spain                                               | 2226  | 61    | 48.2 | Retrospective<br>study | Dyspnea 49.8% /Myalgia<br>26.8%<br>Diarrhea 21.7%                                                                               | Moderate |
| <i>Cabaraux Lechien et al</i> <sup>60</sup> |                                                         | France                                              | 86    | 41.7  | 34.9 | Prospective<br>study   |                                                                                                                                 | High     |
| <i>Zhang Ji et al</i>                       | Feb 1 <sup>st</sup> and<br>Mar 15 <sup>th</sup><br>2020 | China                                               | 135   | 56    | 49.6 | Retrospective<br>study | Cough 100% /Fever 94.8%<br>Fatigue 60.7% /Chest pain<br>34.1%<br>Diarrhea 23.7%                                                 | Moderate |
| <i>Ji Wo et al</i> <sup>61</sup>            | - Apr 8 <sup>th</sup><br>2020                           | South Korea                                         | 65149 | 44    | 48.3 | Retrospective<br>study |                                                                                                                                 | Moderate |
| <i>Zheng F et al</i> <sup>63</sup>          | Jan 17 <sup>th</sup> - Feb<br>7 <sup>th</sup> 2020      | China                                               | 161   | 45    | 49.7 | Retrospective<br>study | Fever 75.8% /Cough<br>62.7%<br>Fatigue 39.8% /Dyspnea<br>14.3%<br>Muscle ache 11.2%                                             | Moderate |
| <i>Wang Z et al</i> <sup>64</sup>           | Jan 16 <sup>th</sup> -<br>Jan 29 <sup>th</sup><br>2020  | China                                               | 69    | 42    | 46   | Retrospective<br>study | Fever 87% /Cough 55%<br>Fatigue 42% /Myalgia 30%<br>Sputum production 29%                                                       | Moderate |
| <i>Corbellini et al</i> <sup>67</sup>       | 23 <sup>rd</sup> - 25 <sup>th</sup><br>Mar 2020         | Spain                                               | 111   | 61.4  | 60.4 | Prospective<br>study   |                                                                                                                                 | Moderate |
| <i>Giacomelli et al</i> <sup>65</sup>       | Mar 19 <sup>th</sup><br>2020                            | Italy                                               | 59    | 60    | 67.8 | Prospective<br>study   | Fever 72.8% /Cough<br>37.3%<br>olfactory and/or taste<br>disorders 33.9%<br>Dyspnea 25.4%                                       | Low      |
| <i>Luers et al</i> <sup>66</sup>            | 22 <sup>th</sup> - 28 <sup>th</sup><br>Mar 2020         | Germany                                             | 72    | 38    | 56.9 | Retrospective<br>study | Headache 77.8% / Sore<br>Throat 62.5%<br>Reduced olfaction 73.6%<br>Muscle aches 70.8%<br>/Cough 75%                            | Moderate |
| <i>Lu Lu et al</i> <sup>68</sup>            | Jan 18 <sup>th</sup> -<br>Feb 18 <sup>th</sup><br>2020  | China                                               | 304   | 44    | 59.9 | Retrospective<br>study |                                                                                                                                 | Moderate |
| <i>Colaneri et al</i> <sup>69</sup>         | 21 <sup>th</sup> - 28 <sup>th</sup><br>Feb 2020         | Italy                                               | 44    | /     | 63.6 | Retrospective<br>study |                                                                                                                                 | Moderate |
| <i>Vaira et al</i> <sup>70</sup>            | Mar 31 <sup>st</sup> -<br>Apr 6 <sup>th</sup> 2020      | Italy                                               | 72    | 49.2  | 37.5 | Prospective<br>study   | Fever 95.8% Cough 83.3%<br>Asthenia 66.7%/Sore<br>throat 51.4%<br>Headache 41.6%                                                | High     |
| <i>Mao et al</i> <sup>71</sup>              | Jan 16 <sup>th</sup> -Feb<br>19 <sup>th</sup> 2020      | China                                               | 214   | 52.7  | 40.7 | Retrospective<br>study | Fever 61.7% Cough 60.0%<br>Anorexia 31.8% /Diarrhea<br>19.2%<br>Throat pain 14.5%                                               | High     |
| <i>Sun et al</i> <sup>72</sup>              | Jan 20 <sup>th</sup> -Feb<br>15 <sup>th</sup> 2020      | China                                               | 55    | 44    | 56.4 | Retrospective<br>study | Fever 81.8% Cough 47.3%<br>Fatigue 25.5%<br>/Expectoration 23.6%<br>White sputum 16.4%<br>Headache 70.3%/Loss of<br>smell 70.2% | Moderate |
| <i>Lechien et al</i> <sup>73</sup>          | Mar 22 <sup>nd</sup> -<br>Apr 10 <sup>th</sup><br>2020  | France,<br>Italy, Spain,<br>Belgium,<br>Switzerland | 1566  | 39.17 | 32.3 | Retrospective<br>study | Nasal obstruction 67.8%<br>Cough 63.2% Asthenia<br>63.3%                                                                        | Moderate |
| <i>Zhang Ya et al</i> <sup>74</sup>         | Jan 18 <sup>th</sup> -<br>Feb 22 <sup>nd</sup><br>2020  | China                                               | 115   | 49.52 | 42.6 | Retrospective<br>study |                                                                                                                                 | Moderate |
| <i>Zheng Y et al</i> <sup>75</sup>          | Jan 16 <sup>th</sup> -<br>Feb 20 <sup>th</sup><br>2020  | China                                               | 99    | 49    | 52   | Retrospective<br>study |                                                                                                                                 | Moderate |
| <i>Wang R et al</i> <sup>76</sup>           | Jan 20 <sup>th</sup> -<br>Feb 9 <sup>th</sup> 2020      | China                                               | 125   | 38.76 | 56.8 | Retrospective<br>study | Fever 92.8% /Cough<br>81.6%<br>Shortness of breath 45.6%<br>Sputum production 41.6%                                             | High     |

## SUPPLEMENTARY DATA

|                                         |                                                  |                                 |       |      |      |                     |                                                                                                               |          |
|-----------------------------------------|--------------------------------------------------|---------------------------------|-------|------|------|---------------------|---------------------------------------------------------------------------------------------------------------|----------|
| <i>Zhang Ju et al</i> <sup>77</sup>     | Jan 13 <sup>th</sup> -Feb 16 <sup>th</sup> 2020  | China                           | 111   | 38   | 41.4 | Retrospective study | Fever 71.2% Cough 37.8%<br>Fatigue 18.0% /Dyspnea 16.2%<br>Chest pain 10.8%                                   | High     |
| <i>Redd et al</i> <sup>78</sup>         | on or before Apr 2 <sup>nd</sup> 2020            | United States                   | 318   | 63.4 | 54.7 | Retrospective study | Fever 81.3% Fatigue 57.5%<br>Myalgia 38.7% /Anorexia 34.8%<br>Diarrhea 33.7%                                  | Moderate |
| <i>Tomlins MBBS et al</i> <sup>79</sup> | 10 <sup>th</sup> -30 <sup>th</sup> Mar 2020      | United Kingdom                  | 95    | 75   | 63   | Retrospective study | Fever 72% /Cough 74%<br>Shortness of breath 43%<br>Confusion 21%/Myalgia 14%                                  | Moderate |
| <i>Huang R et al</i> <sup>80</sup>      | Jan 22 <sup>nd</sup> – Feb 10 <sup>th</sup> 2020 | China                           | 202   | 44   | 57.4 | Retrospective study | Fever 77.2% Cough 59.4%<br>Fatigue 21.8% /Sore throat 11.9%<br>Muscle ache 10.4%                              | Moderate |
| <i>Feng Y et al</i> <sup>81</sup>       | Jan 1 <sup>st</sup> - Feb 15 <sup>th</sup> 2020  | China                           | 476   | 53   | 56.9 | Retrospective study | Fever 85.9% /Dry cough 59.4%<br>Sputum production 35.5%<br>Shortness of breath 24.4%<br>Myalgia 12.6%         | High     |
| <i>Menni et al</i> <sup>82</sup>        |                                                  | United States<br>United Kingdom | 18401 |      |      | Prospective study   |                                                                                                               | Moderate |
| <i>Liu F et al</i> <sup>83</sup>        | Jan 20 <sup>th</sup> -Feb 3 <sup>rd</sup> 2020.  | China                           | 134   | 51.5 | 47   | Retrospective study | Fever 81.3% /Cough 39.6%<br>Fatigue 19.4%/Poor appetite 9.7%<br>Sputum production 17.9%<br>Poor appetite 9.7% | High     |

**Supplementary Table 2.** Publication bias of indicators of multiorgan function and COVID-19 severity.

|                                            | Begg  | Egger |                 | Begg  | Egger |
|--------------------------------------------|-------|-------|-----------------|-------|-------|
| Hypertension                               | 0.195 | 1.479 | CVD             | 0.116 | 0.117 |
| Diabetes                                   | 0.896 | 0.551 | CK              | 0.775 | 0.509 |
| LDH                                        | 0.373 | 0.225 | ALT             | 0.263 | 0.266 |
| AST                                        | 0.902 | 0.911 | Total bilirubin | 0.300 | 0.899 |
| Creatinine                                 | 0.661 | 0.719 | Urea            | 0.474 | 0.430 |
| ARDS                                       | 0.548 | 0.494 | ACI             | 1.00  | 0.223 |
| AKI                                        | 0.466 | 0.361 | Smoker          | 0.152 | 0.268 |
| COPD                                       | 0.65  | 0.009 | CKD             | 0.075 | 0.006 |
| Bilateral involvement of chest radiographs | 0.101 | 0.120 | CLD             | 0.234 | 0.561 |
| Cerebrovascular disease                    | 0.274 | 0.359 | Headache        | 0.01  | 0.047 |
| Anorexia                                   | 0.764 | 0.812 | Dizziness       | 0.368 | 0.554 |
| Abdominal pain                             | 0.368 | 0.834 | Diarrhea        | 0.537 | 0.629 |
| Nausea and/or vomiting                     | 0.371 | 0.909 |                 |       |       |
